# Supplementary material for: 3.4 % solar-to-ammonia efficiency from nitrate using Fe single atomic catalyst supported on MoS2 nanosheets
Source: Research Square preprint supplement (doi:10.21203/rs.3.rs-687134/v1), 2021-07-16
Supplement: Supplementary file 1 [file 1b95bdd505bd3cebdef493f6.pdf]

**Supplementary Information**

**3.4 % solar-to-ammonia efficiency from nitrate using Fe single atomic catalyst  
supported on MoS<sub>2</sub> nanosheets**

Ji Li,<sup>a,b</sup> Yuan Zhang,<sup>a</sup> Chao Liu,<sup>c</sup> Lirong Zheng,<sup>d</sup> Eddy Petit,<sup>b</sup> Kun Qi,<sup>b</sup> Yang Zhang,<sup>b</sup>  
Huali Wu,<sup>b</sup> Wensen Wang,<sup>b</sup> Antoine Tiberj,<sup>e</sup> Xuechuan Wang,<sup>a</sup> Manish Chhowalla,<sup>f</sup>  
Luc Lajaunie,<sup>g,h</sup> Ruohan Yu,<sup>i</sup> Damien Voiry<sup>b,\*</sup>

<sup>a</sup> College of Bioresources and Materials Engineering, Shaanxi University of Science &  
Technology, Xi'an 710021, PR China

<sup>b</sup> Institut Européen des Membranes, IEM, UMR 5635, Université Montpellier, ENSCM,  
CNRS, 34095 Montpellier Cedex 5, France

<sup>c</sup> Shaanxi Collaborative Innovation Center of Industrial Auxiliary Chemistry and  
Technology, Shaanxi University of Science and Technology, Xi'an 710021, PR China

<sup>d</sup> Institute of High Energy Physics, Chinese Academy of Science, Beijing 100049, PR  
China

<sup>e</sup> Laboratoire Charles Coulomb (L2C), Université de Montpellier, CNRS, Montpellier,  
34095, France

<sup>f</sup> Department of Materials Science & Metallurgy, University of Cambridge, Cambridge,  
UK

<sup>g</sup> Departamento de Ciencia de los Materiales e Ingeniería Metalúrgica y Química  
Inorgánica, Facultad de Ciencias, Universidad de Cádiz, Campus Río San Pedro S/N,  
Puerto Real, 11510, Cádiz, Spain

<sup>h</sup> Instituto Universitario de Investigación de Microscopía Electrónica y Materiales  
(IMEYMAT), Facultad de Ciencias, Universidad de Cádiz, Campus Río San Pedro S/N,  
Puerto Real 11510, Cádiz, Spain

<sup>i</sup> Nanostructure Research Centre (NRC), Wuhan University of Technology, Wuhan  
430070, PR China

\* Corresponding author: Damien. Voiry([damien.voiry@umontpellier.fr](mailto:damien.voiry@umontpellier.fr))

## Materials.

Ammonium tetrathiomolybdate ((NH<sub>4</sub>)<sub>2</sub>MoS<sub>4</sub>), iron(III) nitrate nonahydrate (Fe(NO<sub>3</sub>)<sub>3</sub>·9H<sub>2</sub>O), DMF, salicylic acid (SA), ammonium sulfate ((NH<sub>4</sub>)<sub>2</sub>SO<sub>4</sub>), sodium citrate dehydrate, sodium nitroferricyanide dihydrate, sodium hypochlorite solution, HNO<sub>3</sub>, HCl, KNO<sub>3</sub>, K<sup>15</sup>NO<sub>3</sub>, and <sup>15</sup>N labeled ammonium chloride (<sup>15</sup>NH<sub>4</sub>Cl) were purchased from Sigma-Aldrich (France). All the reagents were used as received without further purification. The commercial carbon cloth (CC, HCP331N,) was purchased from Shanghai Hesun Electric Co. (China). The water used throughout all experiments was purified through a Millipore system.

## Synthesis of the MoS<sub>2</sub> catalysts

**Preparation of Fe-MoS<sub>2</sub>.** MoS<sub>2</sub> doped with single atoms of Fe were grown using a hydrothermal method using (NH<sub>4</sub>)<sub>2</sub>MoS<sub>4</sub> and Fe(NO<sub>3</sub>)<sub>3</sub>·9H<sub>2</sub>O as precursors for MoS<sub>2</sub> and Fe respectively.<sup>1,2</sup> The loading amount of Fe in Fe-MoS<sub>2</sub> was controlled by adjusting the atomic ratio: Fe/Mo of the Fe(NO<sub>3</sub>)<sub>3</sub>·9H<sub>2</sub>O and (NH<sub>4</sub>)<sub>2</sub>MoS<sub>4</sub> reagents. Different ratio values in Fe(NO<sub>3</sub>)<sub>3</sub>·9H<sub>2</sub>O and (NH<sub>4</sub>)<sub>2</sub>MoS<sub>4</sub> were investigated: 0/1, 0.025/1, 0.050/1, 0.075/1, to 0.100/1 and the corresponding single-atom catalysts were referred to as Fe-MoS<sub>2</sub>-m where m presents the molar Fe/Mo ratio of the reagents. For example, in the case of Fe-MoS<sub>2</sub>-75, 30.0 mg of (NH<sub>4</sub>)<sub>2</sub>MoS<sub>4</sub>, and 3.5 mg of Fe(NO<sub>3</sub>)<sub>3</sub>·9H<sub>2</sub>O were dissolved into 25 mL of DMF. The mixtures were dispersed at room temperature with the aid of ultrasounds for 10 min to achieve a homogeneous and transparent red-brown solution. Then, the mixture solution was transferred into a 50 mL Teflon-lined autoclave. A carbon cloth (CC, 2 cm × 4 cm) was used to conduct support for the nanosheets and was immersed in the DMF solution. The autoclave was



then sealed and maintained at 210 °C for 18 h in an oven. After cooling the reactor to room temperature, Fe-MoS<sub>2</sub>-75/CC was washed respectively by deionized water and ethanol (3 × 50 mL) to remove unreacted precursors. The Fe-MoS<sub>2</sub>-m samples were dried at 70 °C overnight.

**Preparation of M-MoS<sub>2</sub> with M= Ni, Co, and Cu.** Co, Ni, Cu-MoS<sub>2</sub>/CC, and MoS<sub>2</sub>/CC were prepared following the same procedure as for Fe-MoS<sub>2</sub>. The molar ratio of M/Mo was fixed to a value of 0.075/1 and Co(NO<sub>3</sub>)<sub>2</sub>·6H<sub>2</sub>O, Ni(NO<sub>3</sub>)<sub>2</sub>·6H<sub>2</sub>O, Cu(NO<sub>3</sub>)<sub>2</sub>·3H<sub>2</sub>O were used precursors of Co, Ni, and Cu respectively.

**Preparation of 2H-MoS<sub>2</sub> and defect-rich MoS<sub>2</sub> (d-MoS<sub>2</sub>).** MoS<sub>2</sub> and defect-rich MoS<sub>2</sub> (d-MoS<sub>2</sub>) nanosheets were prepared following our already-reported strategy.<sup>3,4</sup> 2H-MoS<sub>2</sub> was obtained by annealing the as-growth nanosheets (without Fe) under argon (5.0, Linde) at 800 °C for 1 h (the ramping rate is 10 °C/min). d-MoS<sub>2</sub> was obtained by further annealing 2H MoS<sub>2</sub> under Ar/H<sub>2</sub> (5% Varigon, Linde) under vacuum at 600 °C for 30 min with a 10 °C/min ramping rate.

**Preparation of Cu and Cu<sub>50</sub>Ni<sub>50</sub>.** Cu and Cu<sub>50</sub>Ni<sub>50</sub> were prepared by electrodeposition according to a previously reported protocol.<sup>5</sup> 20mM of CuSO<sub>4</sub> and 20mM of Ni(NO<sub>3</sub>)<sub>2</sub> as precursors for the Cu and Ni. A gas diffusion layer (GDL, Fuel Cell Store) was used as conducting support. Prior to depositing the catalysts, the GDL was treated with sulfuric acid by sonication for 20 minutes. After acid treatment, the remaining acid was rinsed with deionized water for 5 min three times, and the gas diffusion layer was dried at room temperature.

## Catalyst characterizations

**Physical characterizations.** A Hitachi S-4800 instrument was used for SEM and EDX characterization. The morphology and crystalline structure of Fe-MoS<sub>2</sub> were further characterized using FEI Talos F200X TEM. Aberration-corrected transmission electron microscopy, including high-resolution (scanning) TEM imaging (HR-(S)TEM), energy-dispersive X-ray spectroscopy (EDS) and spatially-resolved electron energy-loss spectroscopy (SR-EELS), was performed using a FEI Titan Cubed Themis microscope which was operated at 80 kV. The Themis is equipped with a double Cs aberration corrector, a monochromator, an X-FEG gun, a super EDS detector, and an Ultra High Resolution Energy Filter (Gatan Quantum ERS) which allows for working in Dual-EELS mode. HR-STEM imaging was performed by using high-angle annular dark-field (HAADF) and annular dark-field (ADF) detectors. SR-EELS spectra were acquired with the monochromator excited allowing an energy resolution of 1.0 eV for an energy dispersion of 0.25 eV/pixel. Powder XRD patterns were recorded using a PANalytical X'pert Pro diffractometer with a Cu K $\alpha$  source ( $\lambda = 0.154178$  nm). X-ray photoelectron spectrum (XPS) was performed on a Thermo ESCALAB 250XI using monochromatic Al K $\alpha$  radiation. All binding energies of the spectra were corrected to the C1s peak at 284.6 eV. The Raman spectra were acquired using an Invia Raman Microscope (Renishaw, United Kingdom) with an excitation of 633 nm. X-ray absorption spectra (XAS) at the Fe K-edges ( $E_0=7200$  eV) were collected in the fluorescence mode at the SAMBA beamline of the SOLEIL synchrotron radiation facility. The ultraviolet-visible (UV-Vis) absorbance spectra were obtained on a UV/Vis/NIR Jasco V570 spectrometer (Tokyo, Japan). Nuclear magnetic resonance (NMR) spectroscopy was performed at 25 °C on a Bruker AVANCE III HD spectrometer operating at a <sup>1</sup>H frequency of 600 MHz for isotope labeling experiments.

**Electrochemical measurements.** The electrochemical properties of the catalysts were

evaluated in three-electrode and two-electrode configurations using a PARSTAT MC potentiostat (AMETEK Inc., USA). The measurements were performed using an H-type reactor with two compartments separated by a Nafion® 117 membrane. Ag/AgCl electrode with a glass frit was used as the reference electrode in the three-electrode configuration, while a  $1 \times 2 \text{ cm}^2$  carbon cloth modified with the MoS<sub>2</sub> catalyst and Pt foil were used as the working electrode and counter electrode, respectively. The electrolyte consisted in a 0.1 M of NaOH + 0.1 M Na<sub>2</sub>SO<sub>4</sub> solution with 0.1 M of NaNO<sub>3</sub>. 100 mL of electrolyte was distributed to the cathode and anode compartment. All potentials were referenced to the reversible hydrogen electrode (RHE) by the equation:

$$E_{\text{RHE}} = E_{\text{Ag/AgCl}} + 0.197 + 0.059 \times \text{pH}.$$

Before the NO<sub>3</sub>RR measurements, cyclic voltammetry (CV) was run for 30 cycles at a scan rate of 100 mV s<sup>-1</sup> from 1.023 to -0.997 V in order to activate and stabilize the catalyst. The linear sweep voltammetry (LSV) curves were recorded at a scan rate of 20 mV s<sup>-1</sup> from 1.023 to -0.997 V vs. RHE. The catalytic performance of each catalyst was then evaluated using LSV and chronoamperometry at increasing overpotentials for 1 h to determine the Faradaic efficiency (FE) for ammonia. AC impedance measurements were performed in a 3-electrode configuration using a VSP potentiostat (BioLogics, France) at an onset potential of -0.5 V vs. RHE. The frequency range was set from 10 000 Hz to 100 Hz with an AC voltage of 30 mV.

To evaluate the electrochemical specific area, the electrochemical double-layer capacitance ( $C_{dl}$ ) was determined in a potential window without the Faradaic process at increasing scan rates from 20 to 140 mV s<sup>-1</sup>.

**Solar cell testing.** The current-voltage characteristics of the solar panel were recorded

using a dual-source meter unit (Keithley Model 2401B). For the photovoltaic-electrolysis experiments, a GaInAs/Ga(In)As/Ge triple-junction solar cell (HGSC-A100B-2S, Hasunopto, China) was coupled to a 2-electrode H-type cell. A Xenon lamp solar simulator (Oriel LS0106) equipped with a Schott K113 Tempax sunlight filter (Prazisions Glas & Optik GmbH) was used to reproduce an AM1.5G illumination ( $100 \text{ mW cm}^{-2}$ ). The current of the system was recorded using a PARSTAT MC potentiostat in chronoamperometry mode with an applied potential of 0.001V. The optical power was measured by an optical power meter (HP 81630, Agilent, USA).

**PV-electrolysis measurements.** The current-voltage characteristics of the solar panel were recorded using a dual-source meter (Keithley Model 2401). For photocatalysis, a solar panel (4V/350mA, Fuel Cell Store, USA ) as a power source tandem with an H-type cell to drive  $\text{NO}_3\text{RR}$ . The light source was a 450 W xenon lamp (Oriel) equipped with a Schott K113 Tempax sunlight filter (Prazisions Glas & Optik GmbH) to match the emission spectrum of the lamp to the AM1.5G standard. The current of the system was recorded by chronoamperometry with applying an 0.001V of external bias for different periods under chopped AM 1.5G illumination. The optical power of the sun was measured by an optical power meter (HP 81630, Agilent, USA).

**Determination of the  $\text{NH}_3$  concentration via colorimetry.** The colorimetric determination of the concentration of  $\text{NH}_3$  was carried out using UV-vis spectrophotometry and the indophenol blue method.<sup>6</sup> 200  $\mu\text{L}$  aliquots of the electrolyte were collected from the cathode chamber and mixed with 50  $\mu\text{L}$  of 0.75 M  $\text{NaClO}$  ( $\rho_{\text{Cl}} = 4\text{--}4.9$ )/ $\text{NaOH}$ . 500  $\mu\text{L}$  of 0.4 M salicylic acid/ $\text{NaOH}$  (0.32 M) and 50  $\mu\text{L}$  of 1.0% (w/w)  $\text{Na}_2[\text{Fe}(\text{CN})_5\text{NO}]\cdot 2\text{H}_2\text{O}$  solutions were successively added. After 1 hour of reaction, the concentration in ammonia was measured from the absorbance of the solution at  $\lambda = 660 \text{ nm}$ . The Beer-Lambert law combined with a calibration curve was

used to estimate the concentration of ammonia. The Faradaic efficiency and yield rate in  $\text{NH}_3$  were calculated using the following Equations 1 and 2:

$$FE_{\text{NH}_3} = 8 \times F \times C_{\text{NH}_3} \times V / Q \times 100\% \quad (1)$$

$$R_{\text{Yield rate}} = (C_{\text{NH}_3} \times V) / (t \times S) \quad (2)$$

where  $F$  is the Faraday's constant ( $\text{C mol}^{-1}$ ),  $C_{\text{NH}_3}$  is the concentration of  $\text{NH}_3$  in the cathode chamber (M),  $Q$  is the total charge (C) passing the electrode (*i.e.* current times electrolysis time,  $t$  (s) is the electrolysis time,  $S$  ( $\text{cm}^2$ ) is the geometric area of the working electrode.

**Estimation of the energetic efficiency (EE).** The half-cell energy conversion efficiency for the production of  $\text{NH}_3$  in the 3-electrode and 2-electrode configuration was calculated from Equation 3:<sup>7</sup>

$$EE_{\text{NH}_3} = E^\circ \times FE_{\text{NH}_3} / (1.23 - V_{\text{in}}) \quad (3)$$

where  $E^\circ$  is the standard potential of the reaction:

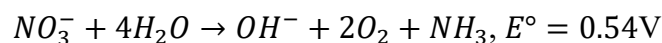

$FE_{\text{NH}_3}$  is the faradaic efficiency for  $\text{NH}_3$ , and  $V_{\text{in}}$  is the applied voltage on the cell of the 3 or 2-electrode configuration system.

**Electric power consumption estimation.** The electric power consumption (EPC) for the 2-electrode configuration represents the amount of electric energy (typically expressed in kWh) that is required for producing 1 kg of product, was calculated for  $\text{NO}_3\text{RR}$  by Equation 4:<sup>8</sup>

$$\text{EPC} = V_{\text{in}} \times n \times F / (FE \times M) \quad (4)$$

where  $n$  is the number of transferred electrons ( $n = 8$  for electrochemical reduction of

NO<sub>3</sub><sup>-</sup> to NH<sub>3</sub>), M is the molecular weight of NH<sub>3</sub>.

**Estimation of the solar-to-Ammonia (STA) conversion efficiency.** The solar-to-ammonia conversion efficiency for the PV-driven electrolysis of nitrate was calculated by equation 5:<sup>9</sup>

$$\text{STA} = (1.23 - E_{\text{NO}_3/\text{NH}_3}^{\circ}) \times I_{\text{op}} \times FE_{\text{NH}_3} / P_{\text{sun}} \quad (5)$$

where  $P_{\text{sun}}$  is the power of the sun (100 mW cm<sup>-2</sup>),  $I_{\text{op}}$  is the current,  $E_{\text{NO}_3/\text{NH}_3}^{\circ}$  is the standard potential (0.69 V vs. RHE, pH = 14).<sup>5</sup>

**Computational details.** All the spin-polarized density functional theory (DFT) calculations were implemented in the Vienna Ab-initio Simulation Package (VASP) code with a projector augmented-wave (PAW) method.<sup>10,11</sup> The exchange-correction energy was described using a generalized gradient approximation (GGA) with a Perdew–Burke–Ernzerhof (PBE) format. A plane-wave basis with a kinetic energy cutoff of 520 eV was chosen to expand the electronic wave functions. For M-MoS<sub>2</sub> (with M=Fe, Co, Ni, and Cu) model, we chose a 4×4×1 supercell of monolayer MoS<sub>2</sub> with a 20 Å vacuum layer above the basal plane and then placed one M atom on Mo topsite as previously described.<sup>12</sup> For MoS<sub>2</sub> M- MoS<sub>2</sub>, the (100) surface of MoS<sub>2</sub> was chosen as the active surface for catalysis because the basal plane was considered to be chemically inert according to previous results from the literature. The (10 $\bar{1}$ 0) edge (i.e Mo-edge) was employed to simulate the NO<sub>3</sub>RR performance on MoS<sub>2</sub> and Fe-doped MoS<sub>2</sub>. All the structures were allowed to fully relax to the ground state with the convergence of the energy and the forces to 1.0 × 10<sup>-5</sup> eV and 0.01 eV Å<sup>-1</sup>. A 3 × 3 × 1  $\Gamma$ -centered Monkhorst-Pack scheme  $k$ -mesh was used to sample the first Brillouin zone. The DFT-D2 of Grimme was used for the long-range dispersion correction.<sup>13</sup> To evaluate the NO<sub>3</sub>RR performance on each catalyst, the considered chemical reactions

can be summarized as shown below (Equations 6-12).

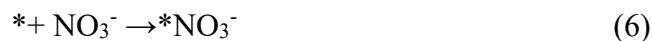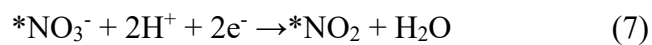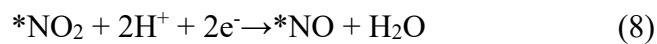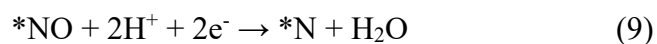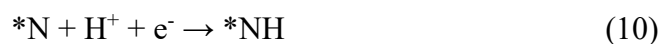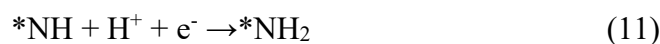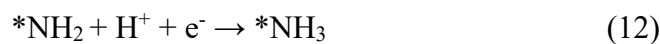

The Gibbs free energy change ( $\Delta G$ ) of the above-mentioned elementary steps was calculated by Equation 13 based on the computational hydrogen electrode (CHE) model proposed by Nørskov et al.<sup>14</sup>

$$\Delta G = \Delta E + \Delta E_{\text{ZPE}} - T\Delta S \quad (13)$$

where  $\Delta E$  is the energy difference before and after adsorption for each elementary step.  $\Delta E_{\text{ZPE}}$  and  $\Delta S$ , respectively, the difference of the zero-point energy and the vibrational entropy. All data are listed in Supplementary Table 4.  $T$  is the temperature (i.e 298.15 K).

### XAS analysis

The acquired EXAFS data were processed according to the standard procedures using the ATHENA module implemented in the IFEFFIT software packages.<sup>15</sup> The k3-weighted EXAFS spectra were obtained by subtracting the post-edge background from the overall absorption and then normalizing for the edge-jump step. Subsequently, k3-weighted  $\chi(k)$  data of Fe K-edge were Fourier transformed to real (R) space using a Hanning window ( $dk=1.0 \text{ \AA}^{-1}$ ) to separate the EXAFS contributions from

different coordination shells. To obtain the quantitative structural parameters around central atoms, least-squares curve parameter fitting was performed using the ARTEMIS module of IFEFFIT software packages.<sup>16,17</sup>

### **DFT analysis**

The BEP relation describes a law with a linear relationship between the adsorption energy of reactant and the reaction energy barrier on the catalyst surface.<sup>18,19</sup> The BEP relation describes the relationship between the adsorption energy of the reactant and the catalytic reaction energy barrier on the active sites, that is, the catalyst with strong reactant adsorption has a low reaction energy barrier, but the product is difficult to desorb. On the contrary, the reaction would be difficult to occur on the catalyst which possesses weak adsorption for reactant, even though the product is facile to desorb from the catalyst. Although it is essential nature for an excellent catalyst with moderate adsorption energy. Here, the Fe-MoS<sub>2</sub> can powerfully reduce the reaction energy barrier of the NO<sub>3</sub>RR (i.e. \*NO-->\*N) due to the strongest adsorption for NO among four SACs.



236 **Supplementary Figures**

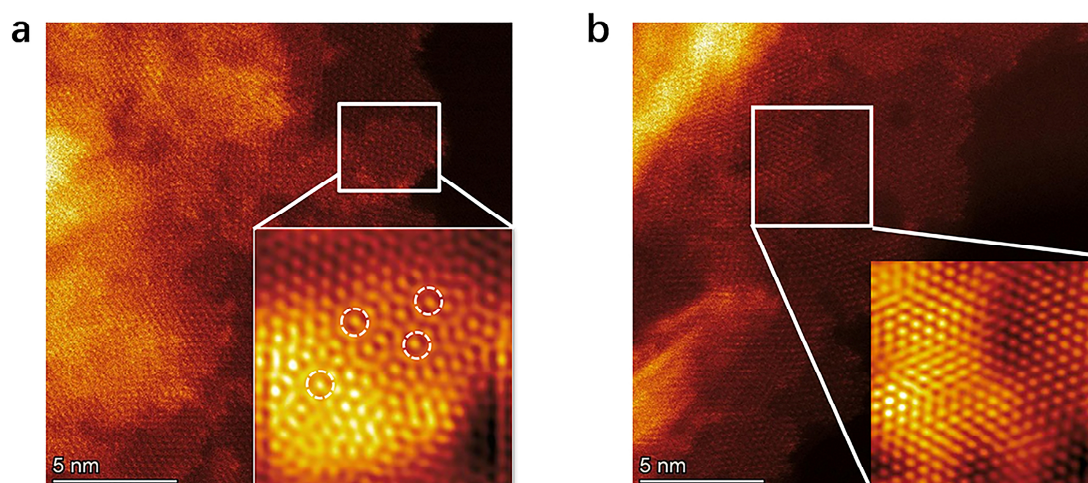

**Supplementary Figure 1.** High-angle annular dark-field scanning transmission electron microscope (HAADF-STEM) images of Fe-MoS<sub>2</sub> (**a**) and MoS<sub>2</sub> (**b**) nanosheets (inset: the corresponding inverse FFT image).

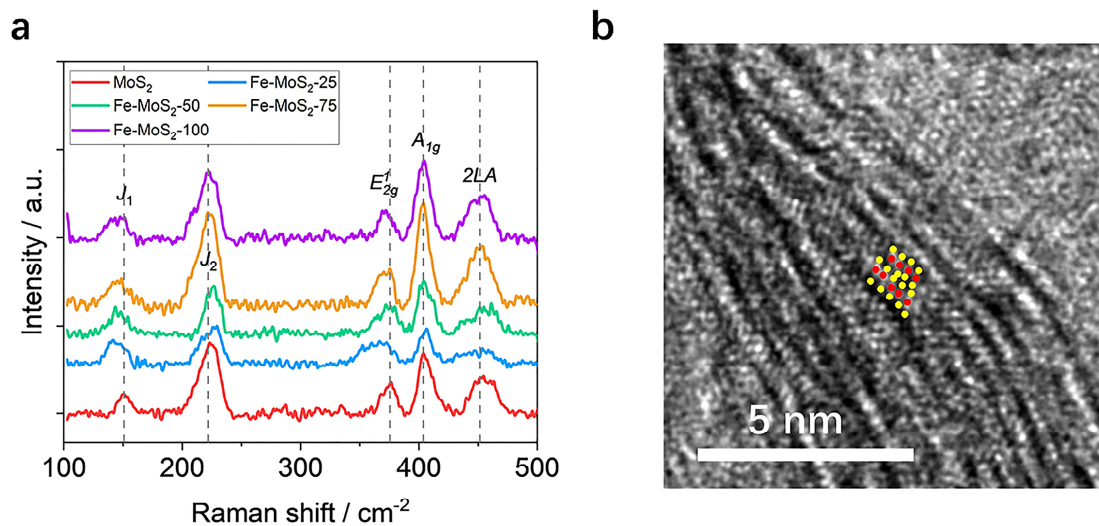

**Supplementary Figure 2. a**, Raman spectra of the Fe-MoS<sub>2</sub> and MoS<sub>2</sub> nanosheets. **b**, HRTEM of Fe-MoS<sub>2</sub> nanosheets.

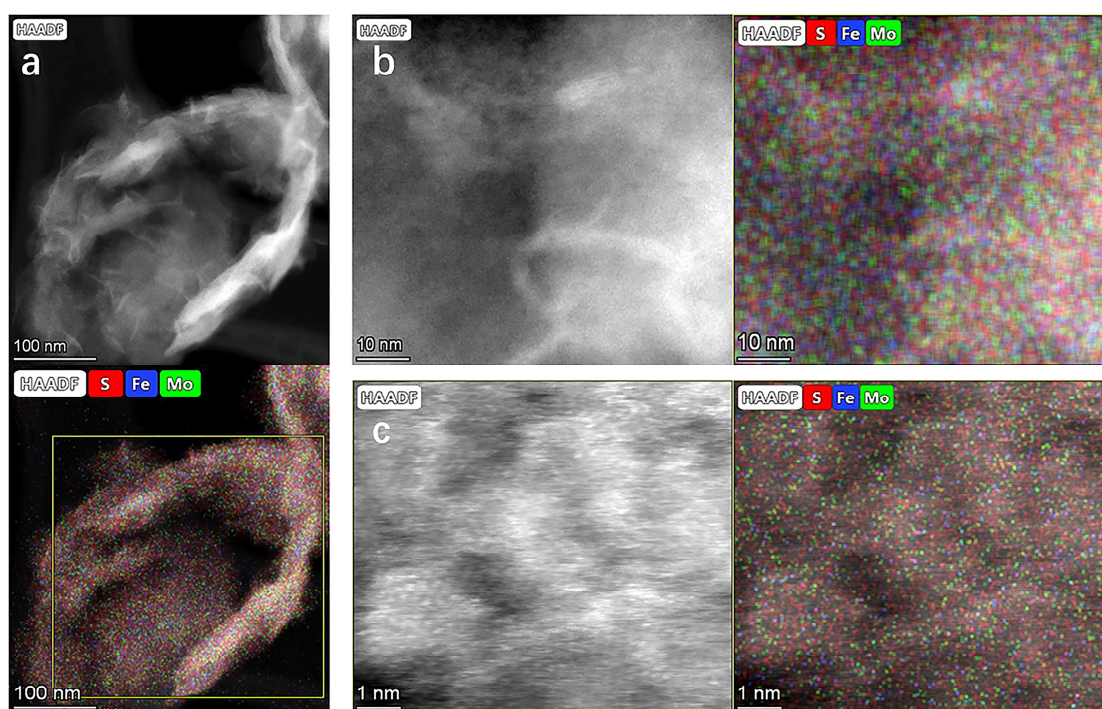

245

246 **Supplementary Figure 3.** High-angle annular dark-field imaging scanning  
247 transmission electron microscopy (HAADF-STEM) image of Fe-MoS<sub>2</sub> nanosheets and  
248 corresponding high-resolution TEM (HRTEM) – energy dispersive X-ray analyses  
249 (EDX), scale bar = 100 nm (a), 10 nm (b), and 1 nm (c).

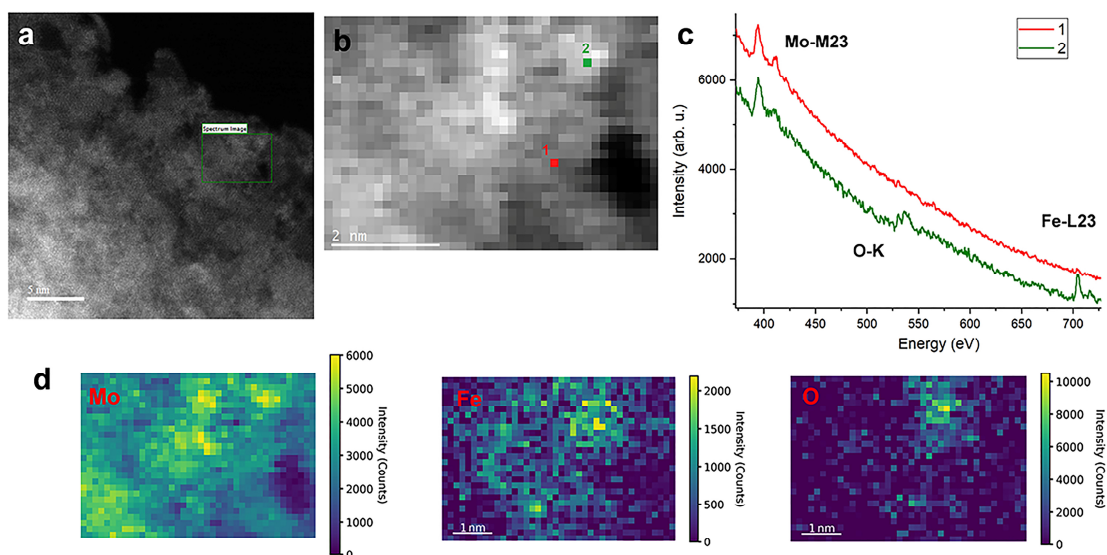

**Supplementary Figure 4. EELS analysis of Fe-MoS<sub>2</sub>.** **a**, ADF image. The green square highlights the area used to acquire the EELS spectrum image. **b**, ADF image acquired simultaneously as the EELS dataset. The green and red voxels highlight the areas used to extract the EELS spectra shown in **c**. **c**, Corresponding EELS spectra. **d**, Corresponding EELS chemical maps. The voxel size is below 0.16 nm.



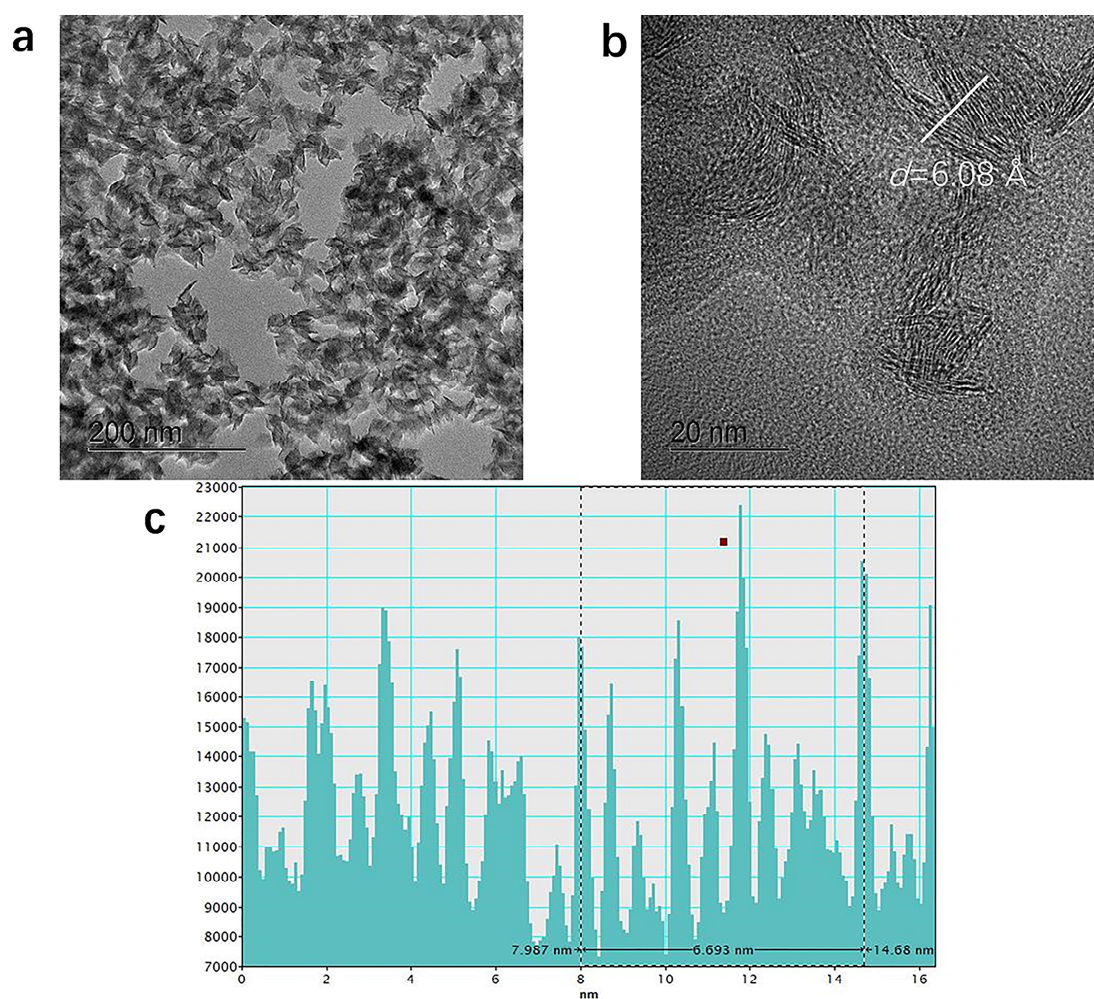

257

258 **Supplementary Figure 5.** TEM (a) and HRTEM (b) images of pristine MoS<sub>2</sub>  
 259 nanosheets, respectively. c, The line profiles across the pristine layers observed under  
 260 HRTEM showing an average d-spacing of 6.08 Å.

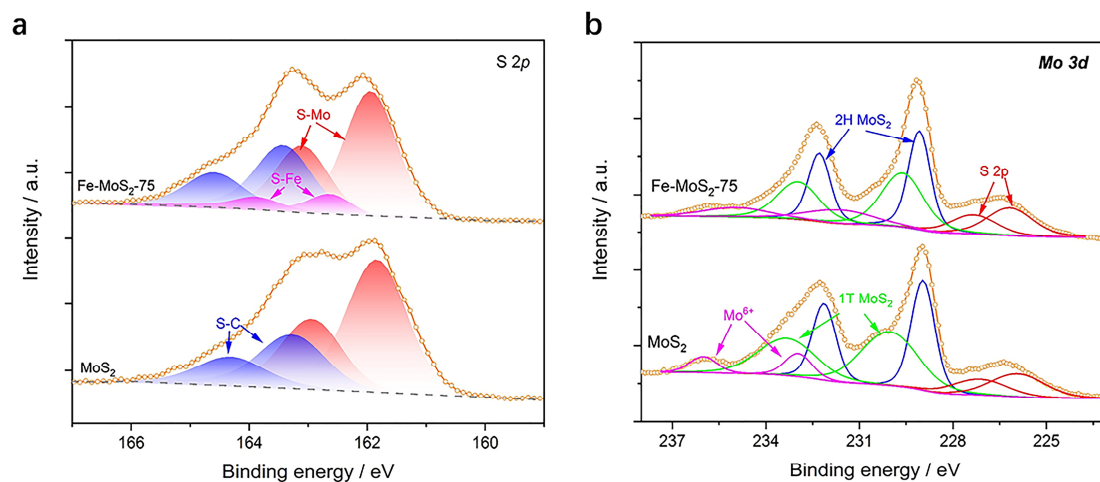

**Supplementary Figure 6.** X-ray photoelectron spectroscopy (XPS) spectra of S 2p (a), and Mo 3d (b) for MoS<sub>2</sub> and Fe-MoS<sub>2</sub> nanosheets.

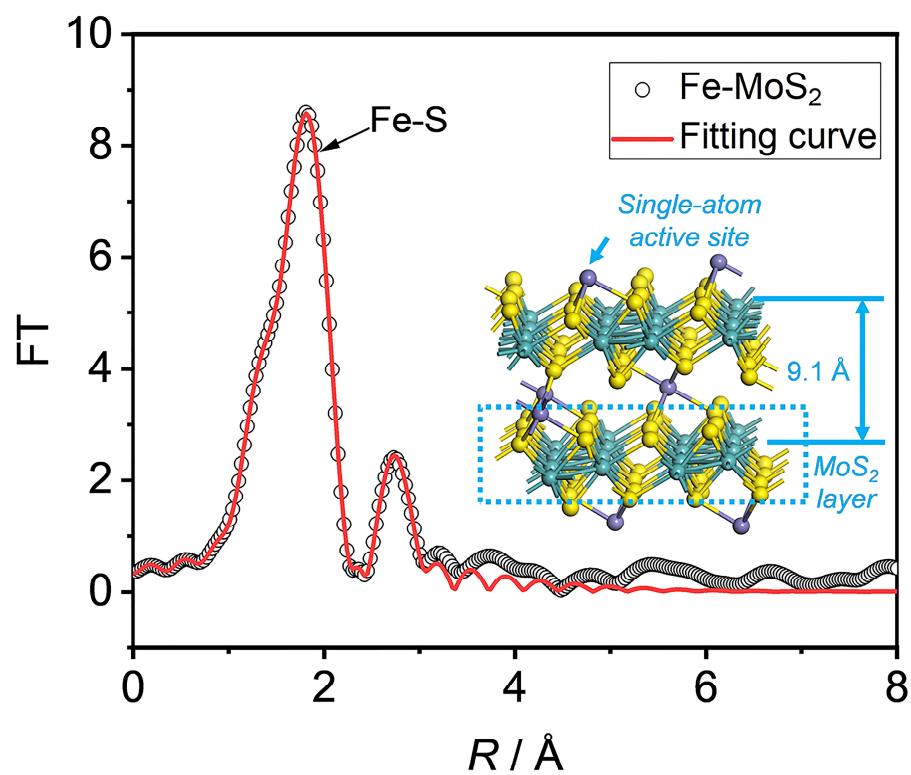

264

265 **Supplementary Figure 7.** Fitting results of Fe-MoS<sub>2</sub> nanosheets, inset its possible

266 structure.

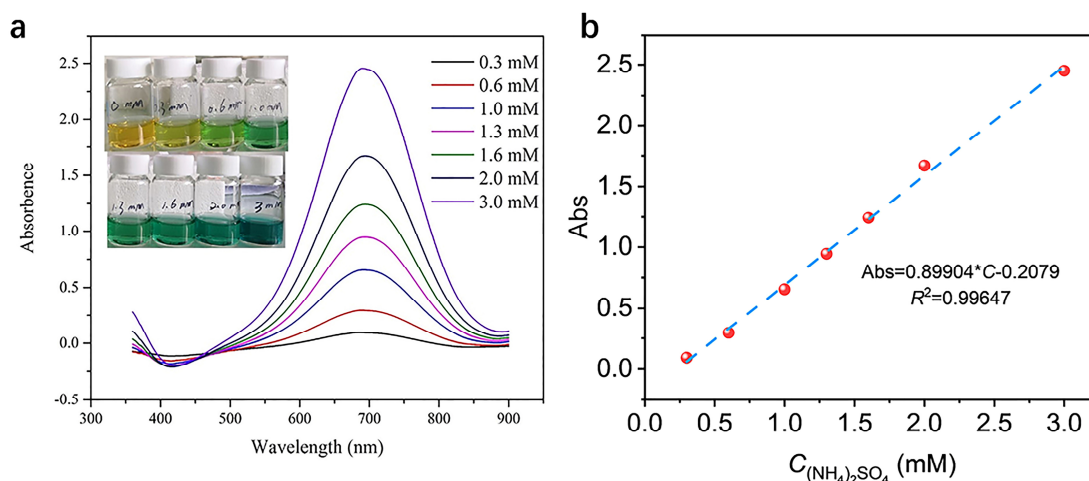

268

269 **Supplementary Figure 8. a**, Photograph of the standard solutions used of the  
 270 calibration curves presented in Supplementary Figure 8b and corresponding UV-visible  
 271 absorption spectra. **b**, Calibration curve of  $\text{NH}_4^+$  ions present in the standard solutions.  
 272 The absorbance at 654.5 nm corresponding to the peak of the ammonia was measured  
 273 to estimate the ammonia concentration in the solutions. The calibration curve showed a  
 274 strictly linear relationship between absorbance and the  $\text{NH}_4^+$  concentration over a large  
 275 range of concentration from 0.3 to 3.0 mM. The ammonia concentration can be  
 276 estimated using Equation 14:

$$\text{Abs} = 0.89904 \times [\text{NH}_4^+] + 0.2079, R^2 = 0.99647 \quad (14)$$

278



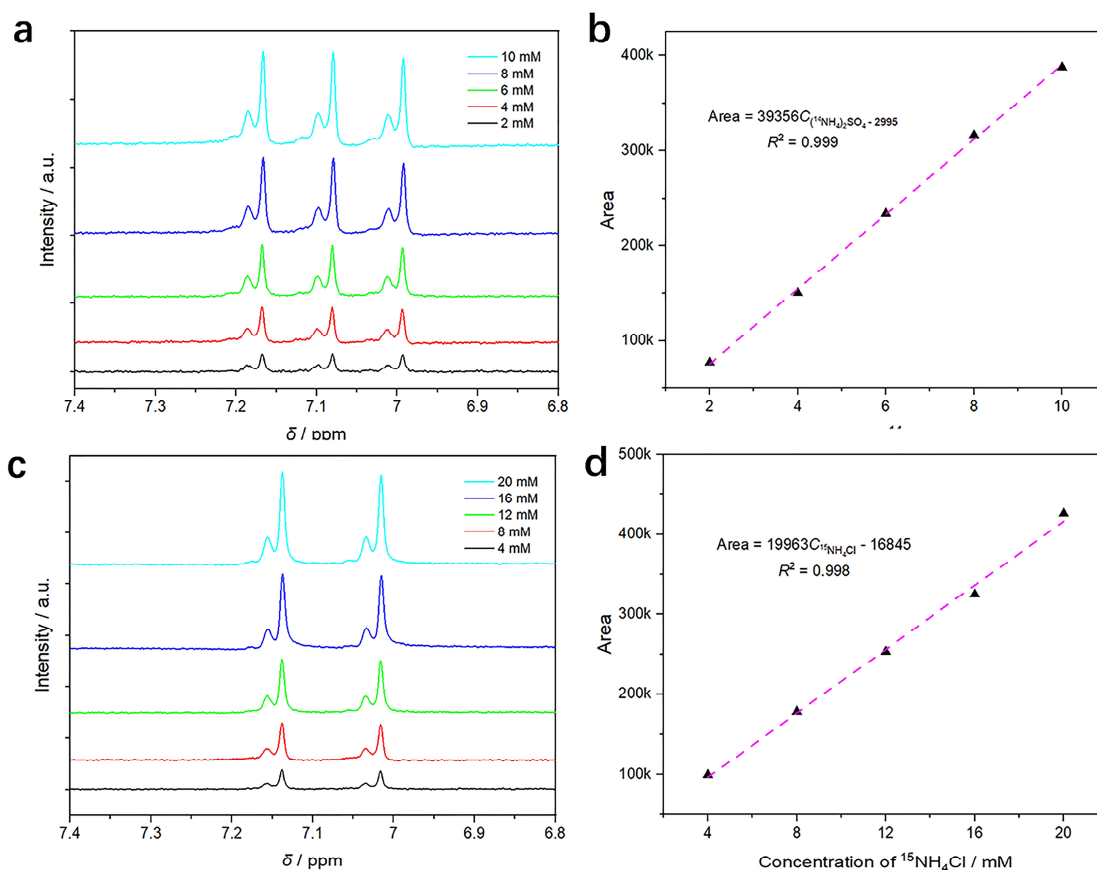

**Supplementary Figure 9.** **a**,  $^1\text{H}$ -NMR spectra of  $(^{14}\text{NH}_4)_2\text{SO}_4$  standard solution at increasing concentrations in the range of 2-10 mM. **b**, Corresponding calibration curve obtained from the integration of the NMR signals. **c**,  $^1\text{H}$ -NMR spectra of  $^{15}\text{NH}_4\text{Cl}$  standard solution at increasing concentrations in the range of 2-10 mM. **d**, Corresponding calibration curve obtained from the integration of the NMR signals.

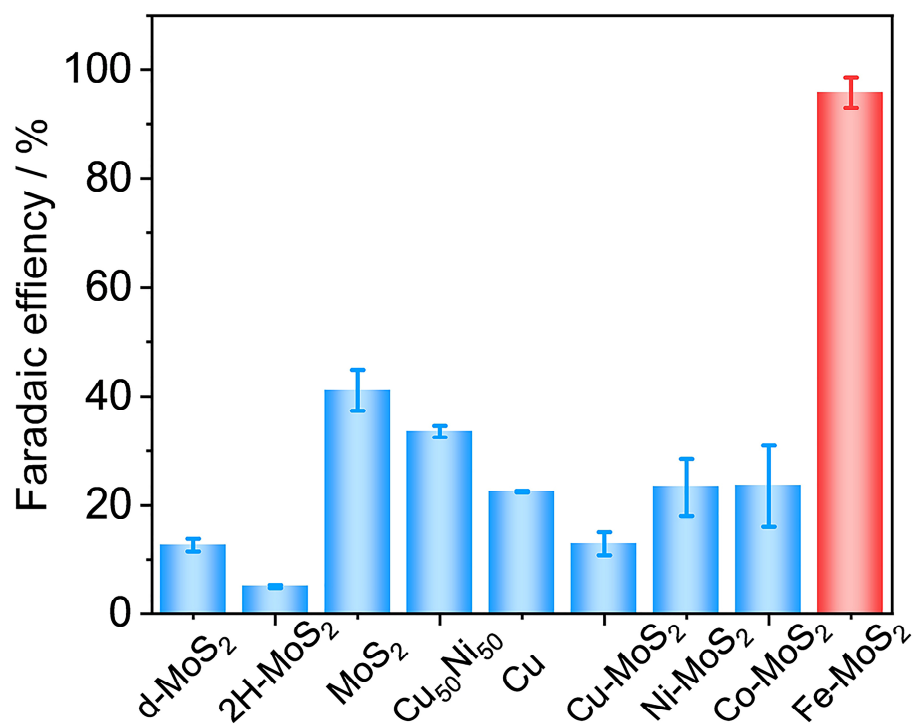

285

286 **Supplementary Figure 10. a**, The Faradaic efficiency of NH<sub>3</sub> of various catalysts  
 287 under a potential of -0.48 V versus RHE. Among the tested catalysts, d-, 2H-, Co- and  
 288 Ni-, and Cu-MoS<sub>2</sub> nanosheets exhibited catalytic activities for the reduction of NO<sub>3</sub><sup>-</sup>  
 289 into NH<sub>3</sub> much lower than that of the Fe-MoS<sub>2</sub> nanosheets.

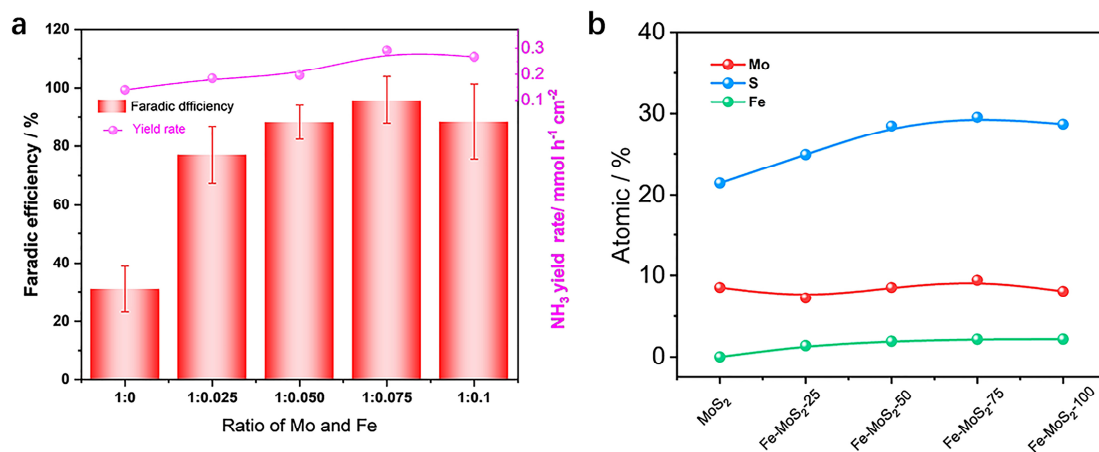

**Supplementary Figure 11. a**, Influence of the Mo/Fe molar ratio in the Fe-MoS<sub>2</sub>-m catalysts on the Faradaic efficiency for ammonia. The measurements were carried out in a 0.1 M electrolyte solution at an applied potential of -0.48 V *versus* the reversible hydrogen electrode (*vs.* RHE). **b**, The atomic percentage of Fe-MoS<sub>2</sub>-m catalysts determined by XPS.

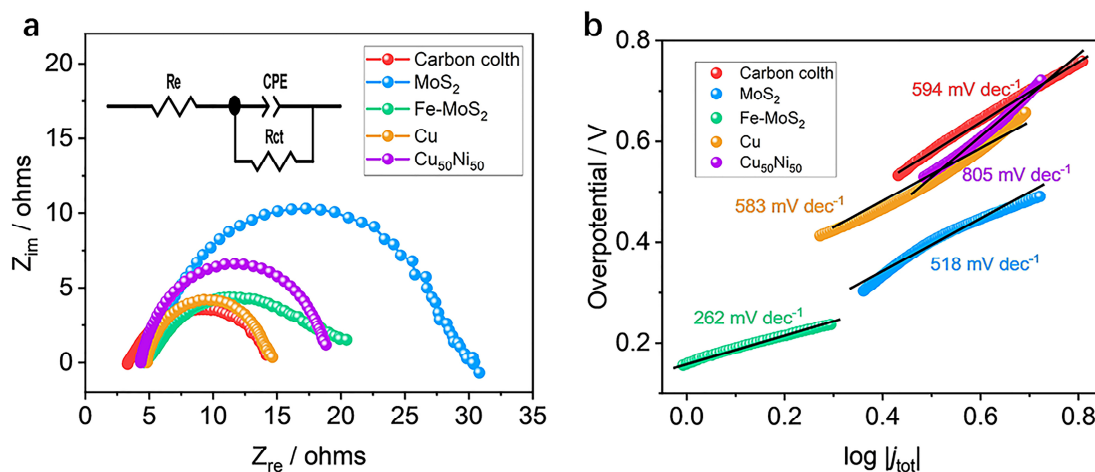

296  
 297 **Supplementary Figure 12. a**, Nyquist plots for Fe- $MoS_2$  nanosheets,  $MoS_2$  nanosheets,  
 298 Cu,  $Cu_{50}Ni_{50}$ , and carbon cloth. The EIS was performed at an onset potential of -0.5 V  
 299 vs. RHE from 100 000 Hz and 100 Hz. **b**, Tafel plots of Fe- $MoS_2$  nanosheets for the  
 300  $NO_3RR$ , compared with  $MoS_2$  nanosheets, Cu,  $Cu_{50}Ni_{50}$ , and carbon cloth.

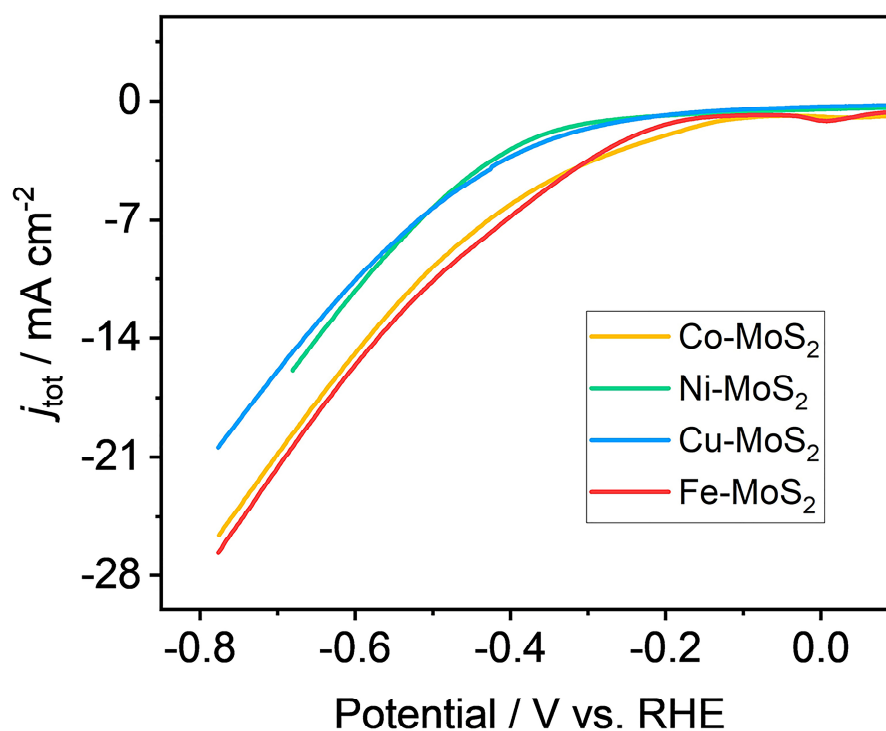

301

302 **Supplementary Figure 13.** Linear scanning voltammetry (LSV) curves for Co-MoS<sub>2</sub>

303 (yellow), Ni-MoS<sub>2</sub> (green), and Cu-MoS<sub>2</sub> (blue), and Fe-MoS<sub>2</sub> nanosheets (red)

304 measured in the presence of 0.1 M NaNO<sub>3</sub> electrolyte.

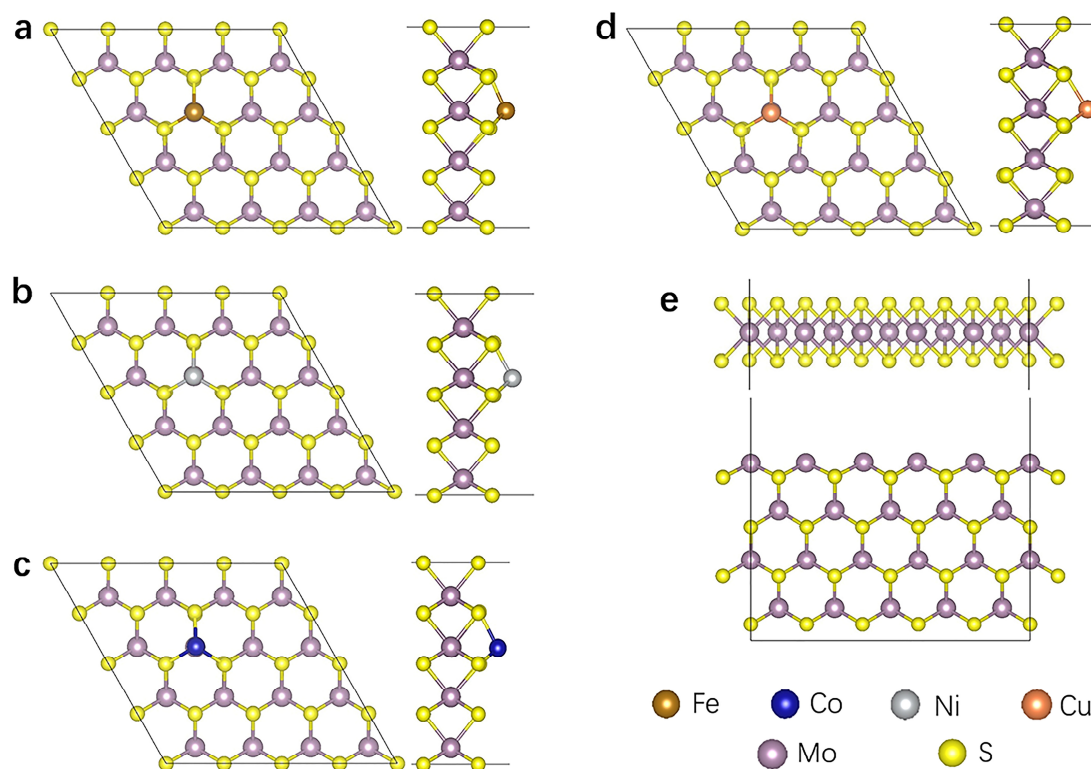

**Supplementary Figure 14.** Top and side views of various transition metals supported on MoS<sub>2</sub> nanosheets (**a** Fe-MoS<sub>2</sub>, **b** Ni-MoS<sub>2</sub>, **c** Co-MoS<sub>2</sub>, and **d** Cu-MoS<sub>2</sub>). Pristine structure for MoS<sub>2</sub> is shown in (e). The color code used for the different elements is as follows: Fe (brown), Mo (violet), S (yellow), Co (blue), Cu (orange), and Ni (grey).

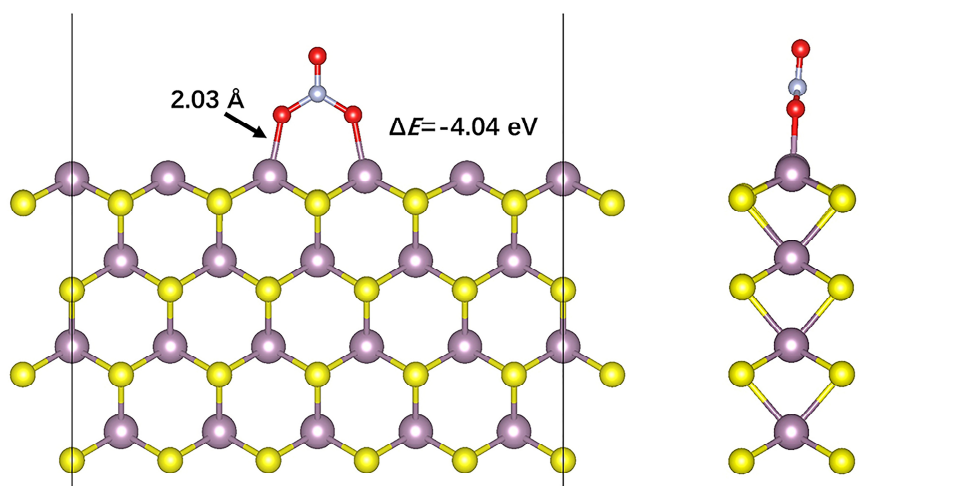

310

311 **Supplementary Figure 15.** Top and side views of the structure of  $\text{NO}_3^-$  adsorbed on

312 the edge of  $\text{MoS}_2$  edge. The color code used of the different elements is as follows: Mo

313 (violet), S (yellow), O (red), N (light blue), respectively.

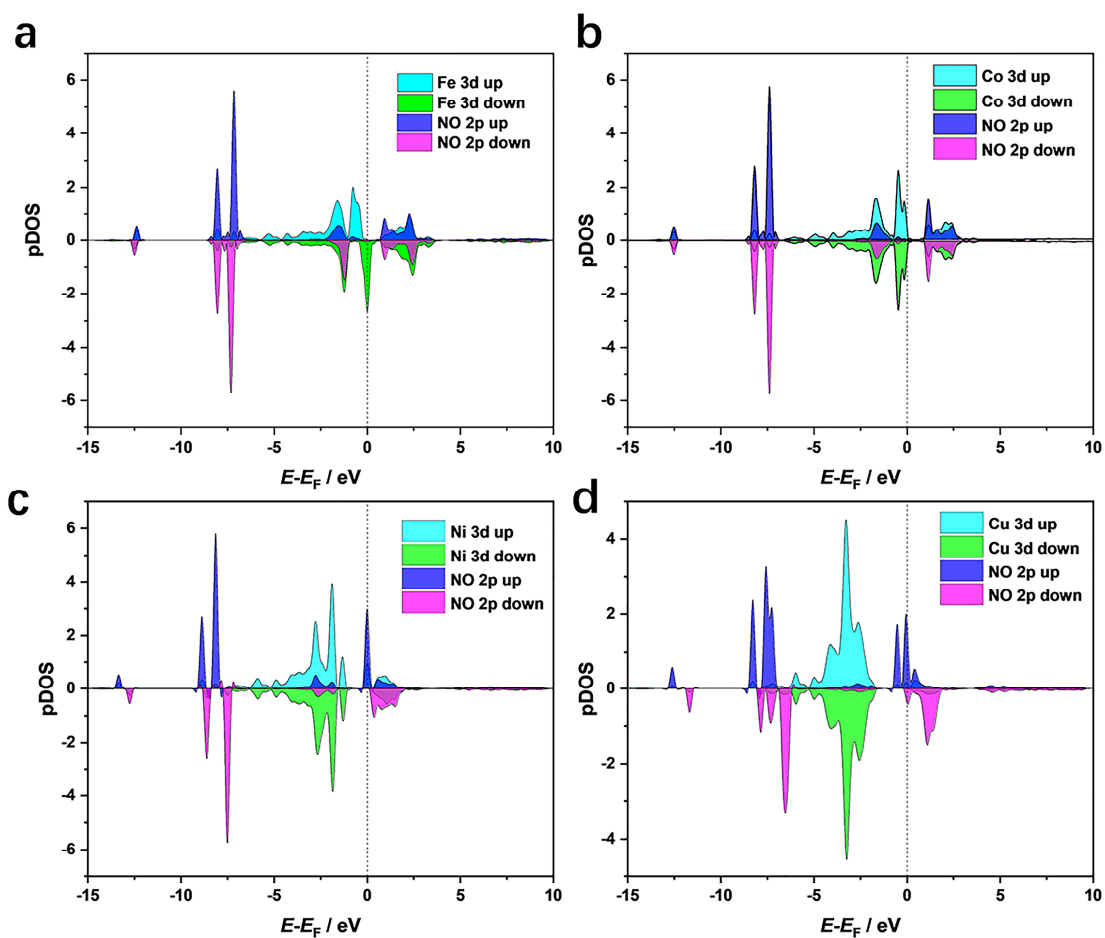

**Supplementary Figure 16.** Projected density of states (PDOS) of NO adsorbed on Fe-MoS<sub>2</sub> (a), Co-MoS<sub>2</sub> (b), Ni-MoS<sub>2</sub> (c), and Cu-MoS<sub>2</sub> (d), respectively.  $E_F$  stands for the Fermi level, referring to 0 eV.



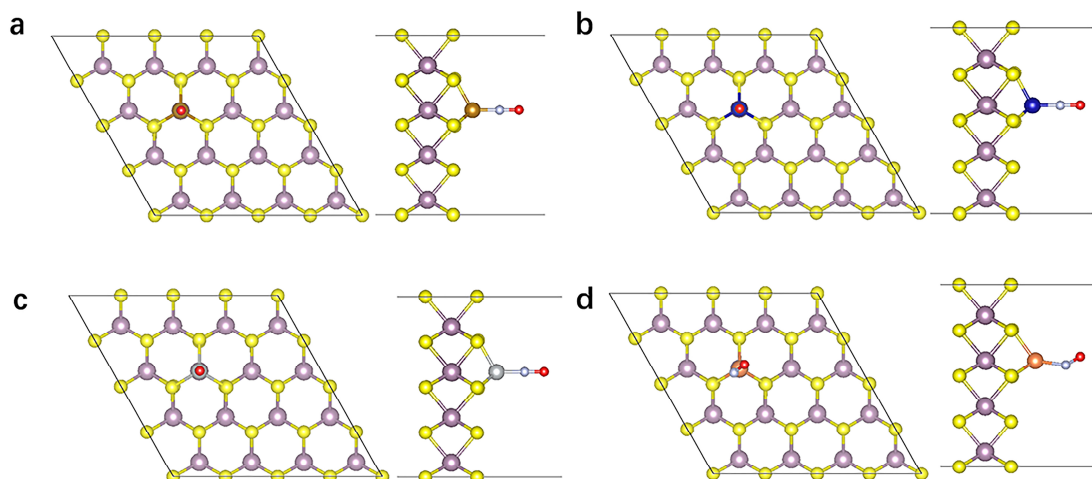

**Supplementary Figure 17.** Top and side views of the structure of NO adsorbed on Fe-MoS<sub>2</sub> (**a**), Co-MoS<sub>2</sub> (**b**), Ni-MoS<sub>2</sub> (**c**), and Cu-MoS<sub>2</sub> (**d**), respectively. The color code used of the different elements is as follows: Fe (brown), Mo (violet), S (yellow), Co (blue), Cu (orange), Ni (grey), N (light blue), and O (red), respectively.

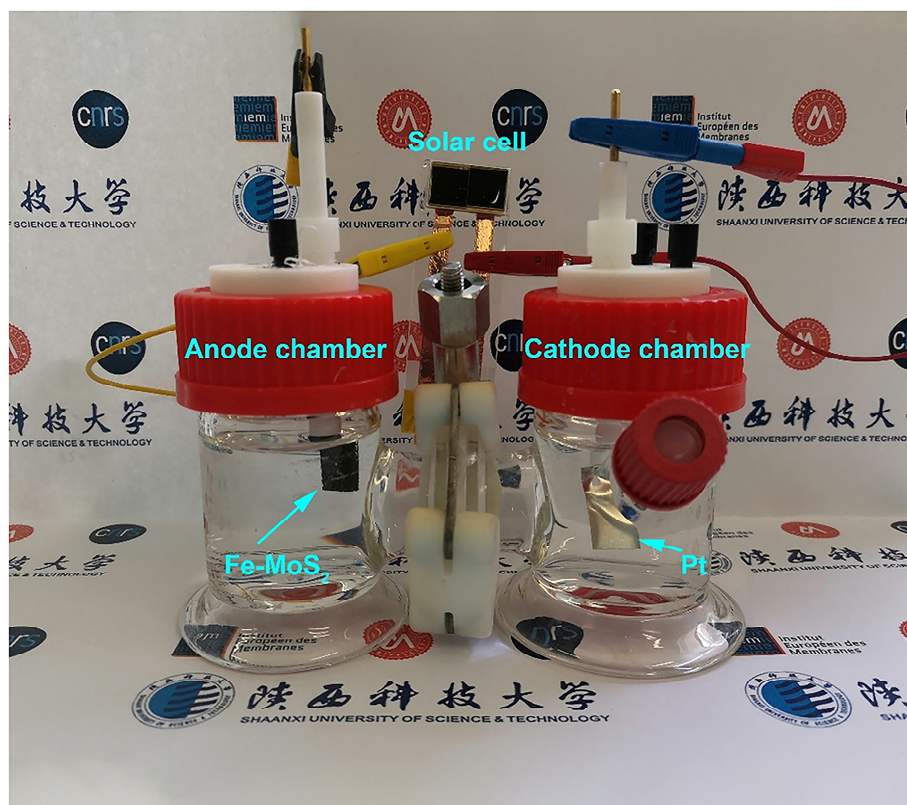

323

324 **Supplementary Figure 18.** Photograph of the 2-electrode H-cell reactor for NO<sub>3</sub>RR

325 using Fe-MoS<sub>2</sub> nanosheets and Pt as catalysts for the cathode and anode respectively.

326 The electrolysis reactor is coupled to the external PV-cell.

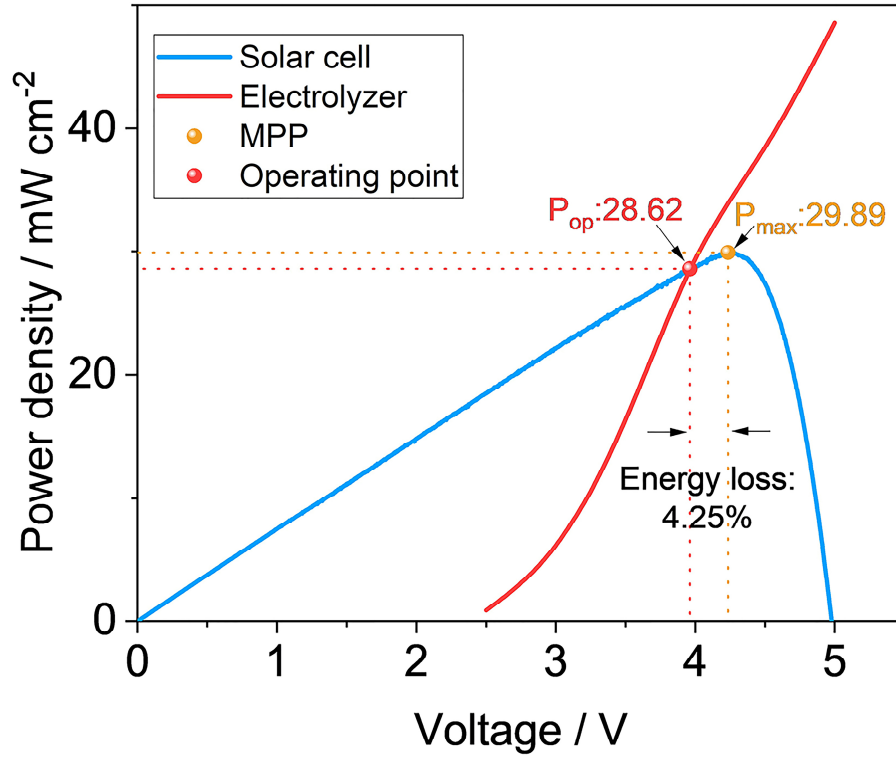

327

328 **Supplementary Figure 19.** The power density of InGaP/GaAs/Ge triple-junction solar

329 cell (area: 2.0 cm<sup>-2</sup>) under AM 1.5G (100 mW cm<sup>-2</sup>) (blue line); and the power density

330 of the 2-electrode electrolyzer under different voltages (red line), in which the 2 cm<sup>-2</sup>

331 of Fe-MoS<sub>2</sub> was used as working electrode.

**Supplementary Table 1.** Extended X-ray absorption fine structure (EXAFS) fitting parameters at the Fe K-edge for Fe-MoS<sub>2</sub>.

| Sample              | Shell   | N <sup>a</sup> | R (Å) <sup>b</sup> | $\sigma^2$ (Å <sup>2</sup> ·10 <sup>-3</sup> ) <sup>c</sup> | $\Delta E_0$ (eV) <sup>d</sup> | R factor (%) |
|---------------------|---------|----------------|--------------------|-------------------------------------------------------------|--------------------------------|--------------|
| Fe-MoS <sub>2</sub> | Fe-O    | 2.7            | 1.97               | 5.7                                                         | -1.5                           | 0.1          |
|                     | Fe-S    | 3.5            | 2.25               | 5.8                                                         | -1.1                           |              |
|                     | Fe-O-Fe | 0.9            | 3.02               | 8.0                                                         | -0.8                           |              |

<sup>a</sup> N: coordination numbers; <sup>b</sup> R: bond distance; <sup>c</sup>  $\sigma^2$ : Debye-Waller factors; <sup>d</sup>  $\Delta E_0$ : the inner potential correction. R factor: goodness of fit.  $S_0^2$  was set as 0.85 for Fe-S, which was obtained from the experimental EXAFS fit of reference FeS by fixing S as the known crystallographic value.

**Supplementary Table 2.** Atomic percent of element (at%) obtained from XPS spectra of MoS<sub>2</sub> and Fe-MoS<sub>2</sub> nanosheets.

| Sample                   | BE(eV) <sup>a</sup> |             |                   | Atomic % <sup>b</sup> |       |       |
|--------------------------|---------------------|-------------|-------------------|-----------------------|-------|-------|
|                          | Mo 3d               | S 2p        | Fe 2p             | Mo 3d                 | S 2p  | Fe 2p |
| MoS <sub>2</sub>         | 229.0/232.3         | 162.0/163.0 | N.F. <sup>c</sup> | 8.51                  | 21.45 | 0     |
| Fe-MoS <sub>2</sub> -25  | 229.0/232.2         | 161.9/163.3 | 708.3/721.0       | 7.21                  | 24.92 | 1.36  |
| Fe-MoS <sub>2</sub> -50  | 229.0/232.3         | 162.0/163.6 | 708.2/721.0       | 8.52                  | 28.44 | 1.89  |
| Fe-MoS <sub>2</sub> -75  | 229.1/232.3         | 162.0/163.2 | 708.3/721.1       | 9.42                  | 29.54 | 2.13  |
| Fe-MoS <sub>2</sub> -100 | 229.2/232.5         | 162.1/163.5 | 708.3/721.1       | 8.03                  | 28.67 | 2.14  |

<sup>a</sup> The binding energy (BE) was corrected for charging effects, using 284.6 eV as the carbon standard. <sup>b</sup> The atomic percentage determined by XPS spectra. <sup>c</sup> N.F means Not found

346 **Supplementary Table 3.** The concentration of  $^{14}\text{NH}_3$  and  $^{15}\text{NH}_3$  detected by NMR  
 347 and UV using 0.5 M  $\text{K}^{14}\text{NO}_3$  and 0.5 M  $\text{K}^{15}\text{NO}_3$  as electrolyte after 4h reaction at -  
 348 0.48 V vs.RHE respectively.

| Samples            | NMR (mM) | UV   | Average (mM) |
|--------------------|----------|------|--------------|
| $^{14}\text{NH}_3$ | 10.48    | 8.77 | 9.62±1.21    |
| $^{15}\text{NH}_3$ | 5.68     | 6.52 | 6.10±0.59    |

349

350 **Supplementary Table 4.** Density functional theory (DFT) calculations of the  
 351 electronic energies and the associated thermodynamic data associated with the  
 352 successive steps for the NO<sub>3</sub>RR.

| Species              | $E_{\text{DFT}}$ (eV) | $E_{\text{ZPE}}$ (eV) | TS (eV) | G (eV) |
|----------------------|-----------------------|-----------------------|---------|--------|
| H <sub>2</sub> O (l) | -14.22                | 0.57                  | 0.57    | -14.22 |
| H <sub>2</sub> (g)   | -6.96                 | 0.27                  | 0.11    | -6.80  |
| NO (g)               | -12.28                | 0.12                  | 0.13    | -12.28 |

**Fe-MoS<sub>2</sub>**

| Species                          | $E_{\text{DFT}}$ (eV) | $E_{\text{ZPE}}$ (eV) | TS (eV) | G (eV)  |
|----------------------------------|-----------------------|-----------------------|---------|---------|
| slab                             | -355.01               | --                    | --      | -355.01 |
| *NO <sub>3</sub> <sup>-a</sup>   | -381.32               | 0.70                  | 0.27    | -380.89 |
| ** NO <sub>3</sub> <sup>-b</sup> | -382.83               | 0.71                  | 0.28    | -382.40 |
| **NO <sub>2</sub>                | -375.40               | 0.27                  | 0.21    | -375.34 |
| **NO                             | -370.38               | 0.20                  | 0.15    | -370.33 |
| **N                              | -362.54               | 0.08                  | 0.07    | -362.53 |
| **NH                             | -366.86               | 0.34                  | 0.12    | -366.64 |
| **NH <sub>2</sub>                | -371.57               | 0.64                  | 0.16    | -371.09 |
| **NH <sub>3</sub>                | -375.82               | 1.02                  | 0.13    | -374.94 |

**Co-MoS<sub>2</sub>**

| Species                         | $E_{\text{DFT}}$ (eV) | $E_{\text{ZPE}}$ (eV) | TS (eV) | G (eV)  |
|---------------------------------|-----------------------|-----------------------|---------|---------|
| slab                            | -354.56               | --                    | --      | -354.56 |
| *NO <sub>3</sub> <sup>-</sup>   | -380.28               | 0.35                  | 0.20    | -380.13 |
| ** NO <sub>3</sub> <sup>-</sup> | -382.02               | 0.40                  | 0.22    | -381.84 |
| **NO <sub>2</sub>               | -374.37               | 0.27                  | 0.15    | -374.25 |
| **NO                            | -369.70               | 0.20                  | 0.09    | -369.59 |

|                   |         |      |      |         |
|-------------------|---------|------|------|---------|
| **N               | -360.71 | 0.06 | 0.05 | -360.69 |
| **NH              | -365.44 | 0.32 | 0.13 | -365.25 |
| **NH <sub>2</sub> | -370.57 | 0.65 | 0.14 | -370.06 |
| **NH <sub>3</sub> | -375.07 | 1.03 | 0.19 | -374.23 |

#### Ni-MoS<sub>2</sub>

| Species                         | $E_{\text{DFT}}$ (eV) | $E_{\text{ZPE}}$ (eV) | TS (eV) | G (eV)  |
|---------------------------------|-----------------------|-----------------------|---------|---------|
| slab                            | -353.51               | --                    | --      | -353.51 |
| *NO <sub>3</sub> <sup>-</sup>   | -379.21               | 0.36                  | 0.26    | -379.11 |
| ** NO <sub>3</sub> <sup>-</sup> | -380.88               | 0.40                  | 0.24    | -380.73 |
| **NO <sub>2</sub>               | -373.02               | 0.27                  | 0.22    | -372.97 |
| **NO                            | -367.47               | 0.17                  | 0.13    | -367.43 |
| **N                             | -358.82               | 0.05                  | 0.09    | -358.87 |
| **NH                            | -363.98               | 0.30                  | 0.14    | -363.82 |
| **NH <sub>2</sub>               | -369.19               | 0.66                  | 0.13    | -368.67 |
| **NH <sub>3</sub>               | -374.34               | 1.03                  | 0.16    | -373.48 |

#### Cu-MoS<sub>2</sub>

| Species                         | $E_{\text{DFT}}$ (eV) | $E_{\text{ZPE}}$ (eV) | TS (eV) | G (eV)  |
|---------------------------------|-----------------------|-----------------------|---------|---------|
| slab                            | -351.00               | --                    | --      | -351.00 |
| *NO <sub>3</sub> <sup>-</sup>   | -376.75               | 0.36                  | 0.20    | -376.59 |
| ** NO <sub>3</sub> <sup>-</sup> | -378.18               | 0.40                  | 0.30    | -378.08 |
| **NO <sub>2</sub>               | -371.51               | 0.25                  | 0.20    | -371.46 |
| **NO                            | -364.51               | 0.15                  | 0.09    | -364.44 |
| **N                             | -355.36               | 0.05                  | 0.11    | -355.42 |
| **NH                            | -361.22               | 0.31                  | 0.15    | -361.07 |
| **NH <sub>2</sub>               | -367.34               | 0.65                  | 0.16    | -366.85 |



|                   |         |      |      |         |
|-------------------|---------|------|------|---------|
| **NH <sub>3</sub> | -371.51 | 1.03 | 0.19 | -370.67 |
|-------------------|---------|------|------|---------|

# **MoS<sub>2</sub>**

| Species                         | <i>E</i> <sub>DFT</sub> (eV) | <i>E</i> <sub>ZPE</sub> (eV) | TS (eV) | G (eV)  |
|---------------------------------|------------------------------|------------------------------|---------|---------|
| slab                            | -414.41                      | --                           | --      | -414.41 |
| *NO <sub>3</sub> <sup>-</sup>   | -441.87                      | 0.36                         | 0.26    | -441.78 |
| ** NO <sub>3</sub> <sup>-</sup> | -445.91                      | 0.37                         | 0.17    | -445.72 |
| **NO <sub>2</sub>               | -436.91                      | 0.25                         | 0.16    | -436.82 |
| **NO                            | -430.85                      | 0.17                         | 0.10    | -430.77 |
| **N                             | -423.54                      | 0.08                         | 0.06    | -423.52 |
| **NH                            | -428.13                      | 0.36                         | 0.09    | -427.86 |
| **NH <sub>2</sub>               | -431.84                      | 0.66                         | 0.13    | -431.31 |
| **NH <sub>3</sub>               | -435.29                      | 1.02                         | 0.17    | -434.44 |

353 <sup>a</sup> \* represent physical adsorption;

354 <sup>b</sup> \*\* represent chemical adsorption.

**Supplementary Table 5.** Comparison of the NO<sub>3</sub>RR performance with those from other reported electrocatalysts.

| Electrocatalyst                   | Onset potential (V vs. RHE) | Faradaic efficiency (%) | Yield rate                                              | Ref.      |
|-----------------------------------|-----------------------------|-------------------------|---------------------------------------------------------|-----------|
| Fe-MoS <sub>2</sub>               | -0.20                       | ~98 ± 8.8 %             | 0.03 mmol cm <sup>-2</sup> h <sup>-1</sup>              | This work |
| Cu/Cu <sub>2</sub> O NWAs         | -0.20                       | ~95.8%                  | 0.249 mmol cm <sup>-2</sup> h <sup>-1</sup>             | 20        |
| Cu <sub>50</sub> Ni <sub>50</sub> | ~0.25                       | ~99%                    | --                                                      | 5         |
| Copper–molecular solid catalyst   | ~0.23                       | ~85.9%                  | 0.025 mmol cm <sup>-2</sup> h <sup>-1</sup>             | 21        |
| Cu nanosheets                     | -0.15                       | 99.7%                   | 390.1 μg mg <sub>Cu</sub> <sup>-1</sup> h <sup>-1</sup> | 22        |
| Titanium                          | --                          | 82%                     | --                                                      | 23        |

363 **Supplementary Table 6.** The  $E_{\text{ads,NO}}$  on various single-atom catalysts.

| Catalysts           | $E^{**\text{NO}}$ (eV) | $E_{\text{slab}}$ (eV) | $E_{\text{NO}}$ (eV) | $\Delta E_{\text{ads,NO}}$ (eV) |
|---------------------|------------------------|------------------------|----------------------|---------------------------------|
| Fe-MoS <sub>2</sub> | -370.38                | -355.01                | -12.28               | -3.09                           |
| Co-MoS <sub>2</sub> | -369.70                | -354.56                | -12.28               | -2.86                           |
| Ni-MoS <sub>2</sub> | -367.47                | -353.51                | -12.28               | -1.68                           |
| Cu-MoS <sub>2</sub> | -364.51                | -351.00                | -12.28               | -1.23                           |

364

**Supplementary Table 7.** Comparison of the NO<sub>3</sub>RR performance with those from other reported photocatalysts.

| Photocatalyst        | Energy efficiency (%) | STA(%) | Yield rate                               | Ref.      |
|----------------------|-----------------------|--------|------------------------------------------|-----------|
| Fe-MoS <sub>2</sub>  | ~21                   | ~3.4 % | 30 μmol cm <sup>-2</sup> h <sup>-1</sup> | This work |
| Pd-TiO <sub>2</sub>  | --                    | --     | 26 μmol h <sup>-1</sup> g <sup>-1</sup>  | 24        |
| TiO <sub>2</sub>     | --                    | --     | 17 μmol h <sup>-1</sup> g <sup>-1</sup>  | 25        |
| NU-1000 supported Fe | --                    | --     | 2.9 μmol h <sup>-1</sup> g <sup>-1</sup> | 26        |

## References

1. Huang, L.-Z. et al. Single Fe atoms confined in two-dimensional MoS<sub>2</sub> for sulfite activation: A biomimetic approach towards efficient radical generation. *Appl. Catal. B Environ.* **268**, 118459 (2020).
2. Zhang, L. et al. Electrochemical Ammonia Synthesis via Nitrogen Reduction Reaction on a MoS<sub>2</sub> Catalyst: Theoretical and Experimental Studies. *Adv. Mater.* **30**, 1800191 (2018).
3. Yang, J. et al. Ultrahigh-current-density niobium disulfide catalysts for hydrogen evolution. *Nat. Mater.* **18**, 1309–1314 (2019).
4. Li, L. et al. Role of sulfur vacancies and undercoordinated Mo regions in MoS<sub>2</sub> nanosheets toward the evolution of hydrogen. *ACS Nano* **13**, 6824–6834 (2019).
5. Wang, Y. et al. Enhanced Nitrate-to-Ammonia Activity on Copper–Nickel Alloys via Tuning of Intermediate Adsorption. *J. Am. Chem. Soc.* **142**, 5702–5708 (2020).
6. Zhu, D. et al. Photo-illuminated diamond as a solid-state source of solvated electrons in water for nitrogen reduction. *Nat. Mater.* **12**, 836–841 (2013).
7. Gurudayal, G. et al. Efficient solar-driven electrochemical CO<sub>2</sub> reduction to hydrocarbons and oxygenates. *Energy Environ. Sci.* **10**, 2222–2230 (2017).
8. Küngas, R. Review—Electrochemical CO<sub>2</sub> Reduction for CO Production: Comparison of Low- and High-Temperature Electrolysis Technologies. *J. Electrochem. Soc.* **167**, 044508 (2020).
9. Chen, Z. et al. Grain-Boundary-Rich Copper for Efficient Solar-Driven

- 392 Electrochemical CO<sub>2</sub> Reduction to Ethylene and Ethanol. *J. Am. Chem. Soc.*  
393 **142**, 6878–6883 (2020).
- 394 10. Kresse, G. et al. Ab initio molecular dynamics for liquid metals. *Phys. Rev. B*  
395 **47**, 558–561 (1993).
- 396 11. Kresse, G. et al. Ab initio molecular dynamics for open-shell transition metals.  
397 *Phys. Rev. B* **48**, 13115–13118 (1993).
- 398 12. Yang, T. et al. High-throughput screening of transition metal single atom  
399 catalysts anchored on molybdenum disulfide for nitrogen fixation. *Nano*  
400 *Energy* **68**, 104304 (2020).
- 401 13. Grimme, S. Semiempirical GGA-type density functional constructed with a  
402 long-range dispersion correction. *J. Comput. Chem.* **27**, 1787–1799 (2006).
- 403 14. Nørskov, J.K. et al. Origin of the overpotential for oxygen reduction at a fuel-  
404 cell cathode. *J. Phys. Chem. B* **108**, 17886–17892 (2004).
- 405 15. Ravel, B. et al. ATHENA, ARTEMIS, HEPHAESTUS: Data analysis for X-  
406 ray absorption spectroscopy using IFEFFIT. In *Journal of Synchrotron*  
407 *Radiation* (International Union of Crystallography), pp. 537–541.
- 408 16. Koningsberger, D.C. et al. X-ray absorption: principles, applications,  
409 techniques of EXAFS, SEXAFS, and XANES.(1988).
- 410 17. Rehr, J.J. et al. Theoretical approaches to x-ray absorption fine structure. *Rev.*  
411 *Mod. Phys.* **72**, 621–654 (2000).
- 412 18. Bligaard, T. et al. The Brønsted-Evans-Polanyi relation and the volcano curve  
413 in heterogeneous catalysis. *J. Catal.* **224**, 206–217 (2004).

- 414 19. Medford, A.J. et al. From the Sabatier principle to a predictive theory of  
415 transition-metal heterogeneous catalysis. *J. Catal.* **328**, 36–42 (2015).
- 416 20. Wang, Y. et al. Unveiling the Activity Origin of a Copper-based Electrocatalyst  
417 for Selective Nitrate Reduction to Ammonia. *Angew. Chemie Int. Ed.* **59**,  
418 5350–5354 (2020).
- 419 21. Chen, G.-F. et al. Electrochemical reduction of nitrate to ammonia via direct  
420 eight-electron transfer using a copper–molecular solid catalyst. *Nat. Energy* **5**,  
421 605–613 (2020).
- 422 22. Fu, X. et al. Alternative route for electrochemical ammonia synthesis by  
423 reduction of nitrate on copper nanosheets. *Appl. Mater. Today* (2020).
- 424 23. McEnaney, J.M. et al. Electrolyte engineering for efficient electrochemical  
425 nitrate reduction to ammonia on a titanium electrode. *ACS Sustain. Chem. Eng.*  
426 (2020).
- 427 24. Walls, J.M. et al. Microwave synthesised Pd–TiO<sub>2</sub> for photocatalytic ammonia  
428 production. *RSC Adv.* **9**, 6387–6394 (2019).
- 429 25. Hirakawa, H. et al. Selective Nitrate-to-Ammonia Transformation on Surface  
430 Defects of Titanium Dioxide Photocatalysts. *ACS Catal.* **7**, 3713–3720 (2017).
- 431 26. Choi, H. et al. Vapor-Phase Fabrication and Condensed-Phase Application of a  
432 MOF-Node-Supported Iron Thiolate Photocatalyst for Nitrate Conversion to  
433 Ammonium. *ACS Appl. Energy Mater.* **2**, 8695–8700 (2019).
- 434
- 435
